# Supplementary material for: Standardized Patient Communication and Low-Value Spinal Imaging: A Randomized Clinical Trial
Source: PubMed Central journal article supplement (PMC11541634; doi:10.1001/jamanetworkopen.2024.41826), 2024-11-06
Supplement: jamanetwopen-e2441826-s003.pdf [file jamanetwopen-e2441826-s003.pdf]

## Data Sharing Statement

Fenton. Standardized Patient Communication and Low-Value Spinal Imaging. *JAMA Netw Open*. Published October 30, 2024. doi:10.1001/jamanetworkopen.2024.41826

### Data

**Additional Information:** NCT 04255199, ClinicalTrials.gov

**Data available:** No
